# Supplementary material
Source: MDPI journal article supplement (https://www.mdpi.com/2673-4079/1/2/12)
Supplement: s1 [file s1]

## Supplementary Materials

# E-Wastes: Bridging the Knowledge Gaps on its Production Budgets at Global Scales, Composition, Recycling and Implications in Sustainability

Hem Ghimire <sup>1</sup> and Parisa A. Ariya <sup>1,2,\*</sup>

Department of Atmospheric and Oceanic Sciences, McGill University, 801 Sherbrooke Street West, Montreal, H3A 2K6 Quebec, Canada; hem.ghimire@mail.mcgill.ca

\* Correspondence: parisa.ariya@mcgill.ca

**Table S1.** Global population and e-waste generation during the period of 2015 to 2019. Source of population [1]. Global e-waste for a particular year is obtained by adding e-wastes of all the continents for the very year taken from the source [2].

| Year | Population (million) | E-Waste (Mt) | E-Waste Generated Per Capita (kg/inh) |
|------|----------------------|--------------|---------------------------------------|
| 2015 | 7379.797             | 46.35        | 6.3                                   |
| 2016 | 7464.022             | 48.20        | 6.5                                   |
| 2017 | 7547.859             | 50.01        | 6.6                                   |
| 2018 | 7631.091             | 51.78        | 6.8                                   |
| 2019 | 7713.468             | 53.60        | 6.9                                   |

**Table S2.** Continental population and e-waste generation in different years. Sources of population and e-waste generation [1,2].

| Year           | Population (Million) | E-Waste (kt) | E-Waste Generated Per Capita (kg/inh) | Year            | Population (million) | E-Waste (kt) | E-Waste Generated Per Capita (kg/inh) |
|----------------|----------------------|--------------|---------------------------------------|-----------------|----------------------|--------------|---------------------------------------|
| <b>Asia</b>    |                      |              |                                       | <b>Americas</b> |                      |              |                                       |
| 2015           | 4433.475             | 20081        | 4.5                                   | 2015            | 980.965              | 11885        | 12.1                                  |
| 2016           | 4476.608             | 21247        | 4.7                                   | 2016            | 989.670              | 12228        | 12.4                                  |
| 2017           | 4519.04              | 22436        | 5                                     | 2017            | 998.175              | 12544        | 12.6                                  |
| 2018           | 4560.667             | 23628        | 5.2                                   | 2018            | 1006.51              | 12835        | 12.8                                  |
| 2019           | 4601.731             | 24896        | 5.4                                   | 2019            | 1014.72              | 13120        | 12.9                                  |
| <b>Europe</b>  |                      |              |                                       | <b>Africa</b>   |                      |              |                                       |
| 2015           | 743.059              | 11393        | 15.3                                  | 2015            | 1182.439             | 2383         | 2                                     |
| 2016           | 744.269              | 11580        | 15.6                                  | 2016            | 1213.041             | 2515         | 2.1                                   |
| 2017           | 745.415              | 11738        | 15.8                                  | 2017            | 1244.222             | 2650         | 2.1                                   |
| 2018           | 746.419              | 11878        | 15.9                                  | 2018            | 1275.921             | 2780         | 2.2                                   |
| 2019           | 747.183              | 12013        | 16.1                                  | 2019            | 1308.064             | 2905         | 2.2                                   |
| <b>Oceania</b> |                      |              |                                       |                 |                      |              |                                       |
| 2015           | 39.859               | 611          | 15.3                                  |                 |                      |              |                                       |
| 2016           | 40.436               | 628          | 15.5                                  |                 |                      |              |                                       |
| 2017           | 41.006               | 642          | 15.7                                  |                 |                      |              |                                       |
| 2018           | 41.571               | 654          | 15.7                                  |                 |                      |              |                                       |
| 2019           | 42.128               | 667          | 15.8                                  |                 |                      |              |                                       |

**Table S3.** Annual population and e-waste generation of different countries in the period between 2015 and 2019. Sources of population and e-waste generation [1,2].

| Year           | Population (Million) | E-Waste (kt) | E-Waste Generated Per Capita (kg/inh) | Year                  | Population (million) | E-Waste (kt) | E-Waste Generated Per Capita (kg/inh) |
|----------------|----------------------|--------------|---------------------------------------|-----------------------|----------------------|--------------|---------------------------------------|
| <b>China</b>   |                      |              |                                       | <b>United States</b>  |                      |              |                                       |
| 2015           | 1406.848             | 8045         | 5.7                                   | 2015                  | 320.878              | 6502         | 20.3                                  |
| 2016           | 1414.049             | 8574         | 6.1                                   | 2016                  | 323.016              | 6618         | 20.5                                  |
| 2017           | 1421.022             | 9086         | 6.4                                   | 2017                  | 325.085              | 6721         | 20.7                                  |
| 2018           | 1427.648             | 9589         | 6.7                                   | 2018                  | 327.096              | 6817         | 20.8                                  |
| 2019           | 1433.784             | 10129        | 7.1                                   | 2019                  | 329.065              | 6918         | 21                                    |
| <b>Germany</b> |                      |              |                                       | <b>United Kingdom</b> |                      |              |                                       |
| 2015           | 81.787               | 1607         | 19.6                                  | 2015                  | 65.860               | 1483         | 22.5                                  |
| 2016           | 82.194               | 1611         | 19.6                                  | 2016                  | 66.298               | 1512         | 22.8                                  |
| 2017           | 82.658               | 1612         | 19.5                                  | 2017                  | 66.727               | 1540         | 23.1                                  |
| 2018           | 83.124               | 1610         | 19.4                                  | 2018                  | 67.142               | 1568         | 23.4                                  |
| 2019           | 83.517               | 1607         | 19.2                                  | 2019                  | 67.530               | 1598         | 23.7                                  |
| <b>France</b>  |                      |              |                                       | <b>Italy</b>          |                      |              |                                       |
| 2015           | 64.453               | 1292         | 20                                    | 2015                  | 60.578               | 1085         | 17.9                                  |
| 2016           | 64.668               | 1314         | 20.3                                  | 2016                  | 60.663               | 1082         | 17.8                                  |
| 2017           | 64.843               | 1334         | 20.6                                  | 2017                  | 60.674               | 1077         | 17.8                                  |
| 2018           | 64.991               | 1350         | 20.8                                  | 2018                  | 60.627               | 1070         | 17.6                                  |
| 2019           | 65.130               | 1362         | 20.9                                  | 2019                  | 60.550               | 1063         | 17.6                                  |
| <b>Canada</b>  |                      |              |                                       | <b>Russia</b>         |                      |              |                                       |
| 2015           | 36.027               | 703          | 19.5                                  | 2015                  | 144.985              | 1494         | 10.3                                  |
| 2016           | 36.383               | 718          | 19.7                                  | 2016                  | 145.275              | 1534         | 10.6                                  |
| 2017           | 36.732               | 732          | 19.9                                  | 2017                  | 145.530              | 1568         | 10.8                                  |
| 2018           | 37.075               | 745          | 20.1                                  | 2018                  | 145.734              | 1599         | 11                                    |
| 2019           | 37.411               | 757          | 20.2                                  | 2019                  | 145.872              | 1631         | 11.2                                  |
| <b>Japan</b>   |                      |              |                                       | <b>Australia</b>      |                      |              |                                       |
| 2015           | 127.985              | 2532         | 19.8                                  | 2015                  | 23.932               | 509          | 21.3                                  |
| 2016           | 127.763              | 2552         | 20                                    | 2016                  | 24.263               | 523          | 21.6                                  |
| 2017           | 127.503              | 2560         | 20.1                                  | 2017                  | 24.585               | 534          | 21.7                                  |
| 2018           | 127.202              | 2564         | 20.2                                  | 2018                  | 24.898               | 543          | 21.8                                  |
| 2019           | 126.860              | 2569         | 20.3                                  | 2019                  | 25.203               | 554          | 22                                    |
| <b>India</b>   |                      |              |                                       | <b>Brazil</b>         |                      |              |                                       |
| 2015           | 1310.152             | 1973         | 1.5                                   | 2015                  | 204.472              | 1813         | 8.9                                   |
| 2016           | 1324.517             | 2225         | 1.7                                   | 2016                  | 206.163              | 1907         | 9.2                                   |
| 2017           | 1338.677             | 2529         | 1.9                                   | 2017                  | 207.834              | 1993         | 9.6                                   |
| 2018           | 1352.642             | 2863         | 2.1                                   | 2018                  | 209.469              | 2070         | 9.9                                   |
| 2019           | 1366.418             | 3230         | 2.4                                   | 2019                  | 211.050              | 2143         | 10.2                                  |
| <b>Mexico</b>  |                      |              |                                       | <b>South Africa</b>   |                      |              |                                       |
| 2015           | 121.858              | 1065         | 8.7                                   | 2015                  | 55.386               | 373          | 6.7                                   |
| 2016           | 123.333              | 1106         | 9                                     | 2016                  | 56.208               | 384          | 6.8                                   |
| 2017           | 124.777              | 1146         | 9.2                                   | 2017                  | 57.010               | 395          | 6.9                                   |
| 2018           | 126.191              | 1183         | 9.4                                   | 2018                  | 57.793               | 406          | 7                                     |
| 2019           | 127.576              | 1220         | 9.6                                   | 2019                  | 58.558               | 416          | 7.1                                   |

## References

1. United Nations World Population Prospects 2019. Available online: <https://population.un.org/wpp/Download/Standard/Population/> (accessed on 31 March 2020)
2. ITU. The Global E-Waste Statistics Partnership. 2020. Available online: <https://globalewaste.org/country-sheets/> (accessed on 5 July 2020).
